# Supplementary material for: Variants of Oxidized Regenerated Cellulose and Their Distinct Effects on Neuronal Tissue
Source: MDPI journal article supplement (doi:10.3390/ijms222111467), 2021-10-25
Supplement: s1 [file s1]

**Table S2. Effect of different ORC and gauze on the number of PI positive neurons and IB<sub>4</sub> positive microglia in OHSC at 24 and 48 hours.**

| Treatment (PI)               | Mean 1 | Mean 2 | Mean Diff.<br>(95% CI) †           | Treatment (PI)               | Mean 1 | Mean 2 | Mean Diff.<br>(95% CI) †           |
|------------------------------|--------|--------|------------------------------------|------------------------------|--------|--------|------------------------------------|
| <b>24 h</b>                  |        |        |                                    | <b>48 h</b>                  |        |        |                                    |
| CTL vs. Gauze                | 5.4    | 42.8   | -37.4 (-156.0 to 81.1)             | CTL vs. Gauze                | 3.4    | 57.6   | -54.1 (-124.1 to 15.9)             |
| CTL vs. Equicel®             | 5.4    | 256.2  | <b>-250.8 (-349.4 to -152.2) †</b> | CTL vs. Equicel®             | 3.4    | 299.4  | <b>-296.0 (-372.6 to -219.3) †</b> |
| CTL vs. Equitamp®            | 5.4    | 108.3  | -103.0 (-215.2 to 9.3)             | CTL vs. Equitamp®            | 3.4    | 57.3   | -53.9 (-119.9 to 12.1)             |
| CTL vs. Tabotamp®            | 5.4    | 230.4  | <b>-225.0 (-316.0 to -134.0) †</b> | CTL vs. Tabotamp®            | 3.4    | 170.4  | <b>-167.0 (-237.0 to -97.0) †</b>  |
| Gauze vs. Equicel®           | 42.8   | 256.2  | <b>-213.4 (-327.3 to -99.5) †</b>  | Gauze vs. Equicel®           | 57.6   | 299.4  | <b>-241.8 (-318.5 to -165.2) †</b> |
| Gauze vs. Equitamp®          | 42.8   | 108.3  | -65.5 (-191.4 to 60.4)             | Gauze vs. Equitamp®          | 57.6   | 57.3   | 0.2 (-65.6 to 66.2)                |
| Gauze vs. Tabotamp®          | 42.8   | 230.4  | <b>-187.6 (-295.0 to -80.2) †</b>  | Gauze vs. Tabotamp®          | 57.6   | 170.4  | <b>-112.9 (-182.9 to -42.9) †</b>  |
| Equicel® vs. Equitamp®       | 256.2  | 108.3  | <b>147.9 (40.5 to 255.2) †</b>     | Equicel® vs. Equitamp®       | 299.4  | 57.3   | <b>242.1 (169.0 to 315.1) †</b>    |
| Equicel® vs. Tabotamp®       | 256.2  | 230.4  | 25.8 (-59.1 to 110.7)              | Equicel® vs. Tabotamp®       | 299.4  | 170.4  | <b>129.0 (52.3 to 205.6) †</b>     |
| Equitamp® vs. Tabotamp®      | 108.3  | 230.4  | <b>-122.1 (-222.5 to -21.6) †</b>  | Equitamp® vs. Tabotamp®      | 57.3   | 170.4  | <b>-113.1 (-179.1 to -47.1) †</b>  |
| Treatment (IB <sub>4</sub> ) | Mean 1 | Mean 2 | Mean Diff.<br>(95% CI) †           | Treatment (IB <sub>4</sub> ) | Mean 1 | Mean 2 | Mean Diff.<br>(95% CI) †           |
| <b>24 h</b>                  |        |        |                                    | <b>48 h</b>                  |        |        |                                    |
| CTL vs. Gauze                | 12.5   | 14.8   | -2.3 (-11.4 to 6.8)                | CTL vs. Gauze                | 11.0   | 25.0   | <b>-14.0 (-23.7 to -4.3) †</b>     |
| CTL vs. Equicel®             | 12.5   | 23.3   | <b>-10.8 (-18.4 to -3.2) †</b>     | CTL vs. Equicel®             | 11.0   | 26.8   | <b>-15.8 (-26.5 to -5.1) †</b>     |
| CTL vs. Equitamp®            | 12.5   | 16.5   | -4.0 (-12.7 to 4.6)                | CTL vs. Equitamp®            | 11.0   | 17.8   | -6.8 (-16.0 to 2.4)                |
| CTL vs. Tabotamp®            | 12.5   | 1.4    | <b>11.1 (4.1 to 18.1) †</b>        | CTL vs. Tabotamp®            | 11.0   | 0.3    | <b>10.7 (1.0 to 20.5) †</b>        |
| Gauze vs. Equicel®           | 14.8   | 23.3   | -8.5 (-17.3 to 0.2)                | Gauze vs. Equicel®           | 25.0   | 26.8   | -1.8 (-12.5 to 8.9)                |
| Gauze vs. Equitamp®          | 14.8   | 16.5   | -1.7 (-11.4 to 8.0)                | Gauze vs. Equitamp®          | 25.0   | 17.8   | 7.2 (-2.0 to 16.4)                 |
| Gauze vs. Tabotamp®          | 14.8   | 1.4    | <b>13.4 (5.2 to 21.7) †</b>        | Gauze vs. Tabotamp®          | 25.0   | 0.3    | <b>24.7 (15.0 to 34.5) †</b>       |
| Equicel® vs. Equitamp®       | 23.3   | 16.5   | 6.8 (-1.4 to 15.1)                 | Equicel® vs. Equitamp®       | 26.8   | 17.8   | 9.0 (-1.1 to 19.2)                 |
| Equicel® vs. Tabotamp®       | 23.3   | 1.4    | <b>21.9 (15.4 to 28.5) †</b>       | Equicel® vs. Tabotamp®       | 26.8   | 0.3    | <b>26.5 (15.8 to 37.2) †</b>       |
| Equitamp® vs. Tabotamp®      | 16.5   | 1.4    | <b>15.1 (7.4 to 22.8) †</b>        | Equitamp® vs. Tabotamp®      | 17.8   | 0.3    | <b>17.5 (8.3 to 26.7) †</b>        |

For statistical analysis the one-way ANOVA was used followed by Bonferroni's test for multiple comparisons between the groups. The respective mean value as well as the mean difference and 95% confidence interval is shown. † indicates p<0.05.
