# Supplementary material for: Variants of Oxidized Regenerated Cellulose and Their Distinct Effects on Neuronal Tissue
Source: MDPI journal article supplement (doi:10.3390/ijms222111467), 2021-10-25
Supplement: s1 [file s1]

Supplementary Fig. S1

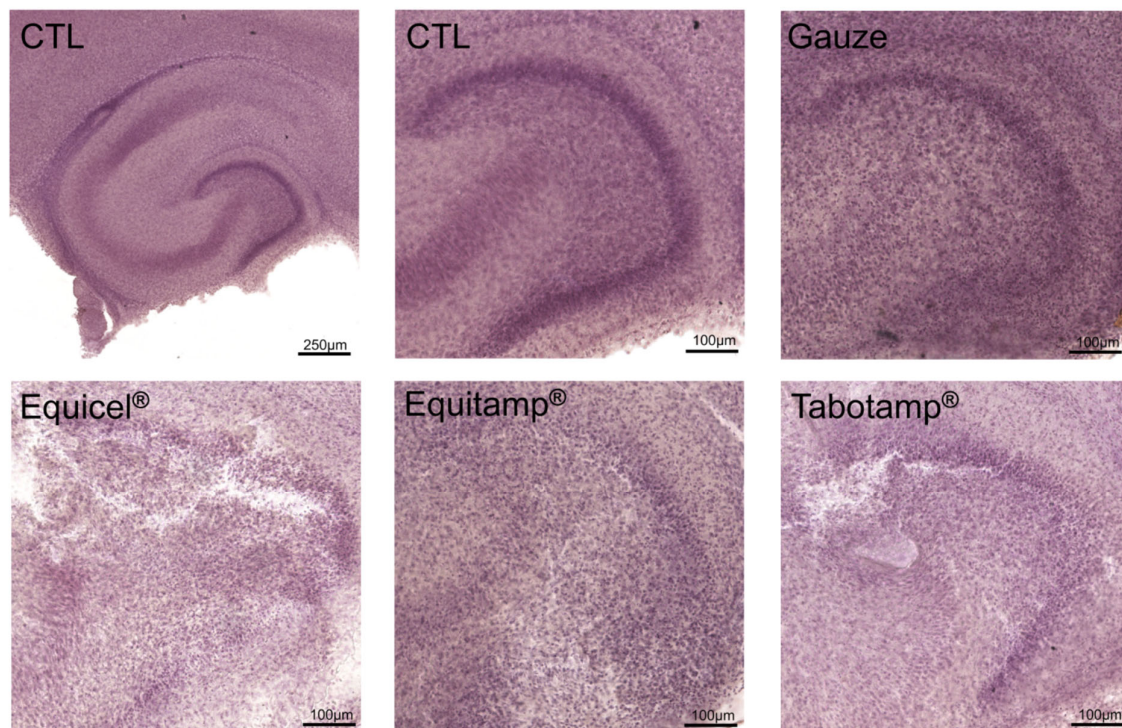

**Figure S1. Hematoxylin staining of OHSC.** In the control group (CTL) and after treatment with the gauze, a very well preserved cytoarchitecture is shown in which the hilus region as well as the dental gyrus are well recognizable. Especially after Equicel® and Tabotamp® treatment, numerous pyknotic nuclei and a clearly changed cytoarchitecture were observed. In contrast, Equitamp® treated groups achieved a better preserved cytoarchitecture. Bars = 250 µm (left upper picture) or 100 µm.
