# Supplementary material for: Variants of Oxidized Regenerated Cellulose and Their Distinct Effects on Neuronal Tissue
Source: MDPI journal article supplement (doi:10.3390/ijms222111467), 2021-10-25
Supplement: s1 [file s1]

Supplementary Fig. S2

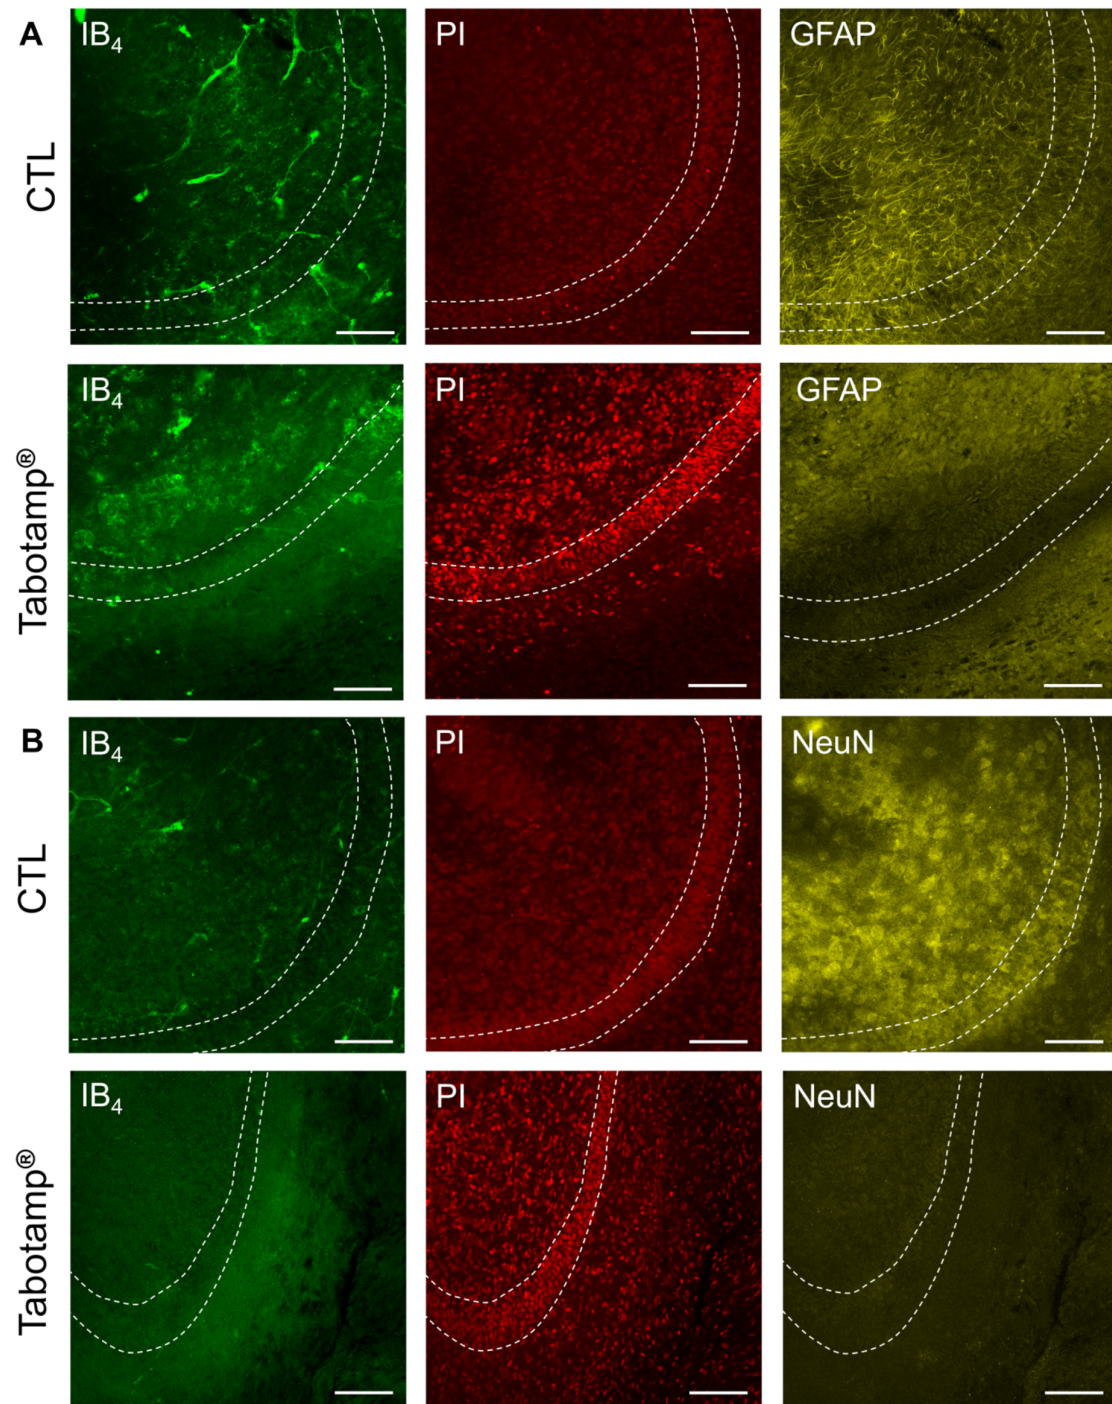

**Figure S2. Triple labeling and confocal laser scanning microscopy of control and with Tabotamp® treated OHSC.** Microglia are stained by IB<sub>4</sub> (green), damaged neurons by PI (red), astrocytes by GFAP (yellow) (A) and neurons by NeuN staining (yellow) (B). In the control groups (CTL) several microglial cells and a few PI positive cells are visible (A, B). Tabotamp® showed only few IB<sub>4</sub> positive microglia compared to CTL, as well as a clear increase in PI positive cells in the dental gyrus (DG) (A, B). In addition, in the CTL the typical morphology of GFAP immunoreactive astrocytes (A) and NeuN positive neuronal cell bodies (B) are shown. In the Tabotamp® treated groups, a similar picture as in the IB<sub>4</sub> staining was observed for the immunofluorescence of GFAP (A) as well as for the NeuN staining (B). Dotted lines mark the borders of GCL. Bars = 100  $\mu$ m.
