# Supplementary material for: Variants of Oxidized Regenerated Cellulose and Their Distinct Effects on Neuronal Tissue
Source: MDPI journal article supplement (doi:10.3390/ijms222111467), 2021-10-25
Supplement: s1 [file s1]

**Table S1. Impact of ORC products and gauze on cell death of Schwann cells, neuronal cells and astrocytes.**

|                               | SW10                              | RN33B                              | C8D1A                              | Primary astrocytes                 |
|-------------------------------|-----------------------------------|------------------------------------|------------------------------------|------------------------------------|
| Treatment                     | Mean Diff.<br>(95% CI) †          | Mean Diff.<br>(95% CI) †           | Mean Diff.<br>(95% CI) †           | Mean Diff.<br>(95% CI) †           |
| CTL vs. Gauze 33%             | -5.22 (-16.38 to 5.95)            | -16.45 (-39.30 to 6.39)            | -9.48 (-30.90 to 11.94)            | -16.98 (-47.88 to 13.93)           |
| CTL vs. Gauze 55%             | -4.82 (-15.98 to 6.34)            | -18.38 (-41.23 to 4.46)            | <b>-21.82 (-43.24 to -0.40) †</b>  | <b>-31.90 (-62.80 to -0.99) †</b>  |
| CTL vs. Gauze 100%            | -5.05 (-16.21 to 6.11)            | -21.31 (-44.15 to 1.53)            | -14.37 (-35.79 to 7.05)            | <b>-39.15 (-70.05 to -8.25) †</b>  |
| CTL vs. Equicel 33%           | -6.72 (-17.88 to 4.45)            | <b>-28.27 (-56.25 to -0.29) †</b>  | <b>-39.27 (-60.69 to -17.85) †</b> | -7.58 (-38.48 to 23.32)            |
| CTL vs. Equicel 55%           | <b>-13.31 (-24.48 to -2.15) †</b> | <b>-43.33 (-66.17 to -20.48) †</b> | <b>-60.69 (-82.11 to -39.27) †</b> | <b>-41.41 (-72.31 to -10.50) †</b> |
| CTL vs. Equicel 100%          | <b>-15.28 (-26.44 to -4.11) †</b> | <b>-52.15 (-75.00 to -29.31) †</b> | <b>-69.59 (-91.00 to -48.17) †</b> | <b>-51.46 (-82.37 to -20.56) †</b> |
| CTL vs. Equitamp 33%          | 3.23 (-7.86 to 14.46)             | -9.96 (-32.81 to 12.88)            | -1.87 (-23.29 to 19.55)            | -2.16 (-33.07 to 28.74)            |
| CTL vs. Equitamp 55%          | 1.56 (-9.60 to 12.73)             | -14.90 (-37.74 to 7.95)            | -2.41 (-23.83 to 19.01)            | -5.57 (-36.48 to 25.33)            |
| CTL vs. Equitamp 100%         | -2.93 (-14.09 to 8.24)            | -13.54 (-36.38 to 9.31)            | -0.22 (-21.64 to 21.20)            | -7.86 (-38.77 to 23.04)            |
| Gauze 33% vs. Gauze 55%       | 0.40 (-10.77 to 11.56)            | -1.93 (-24.78 to 20.91)            | -12.34 (-33.76 to 9.08)            | -14.92 (-45.82 to 15.98)           |
| Gauze 33% vs. Gauze 100%      | 0.18 (-11.00 to 11.33)            | -4.86 (-27.70 to 17.98)            | -4.90 (-26.32 to 16.52)            | -22.17 (-53.07 to 8.73)            |
| Gauze 33% vs. Equicel 33%     | -1.50 (-12.66 to 9.66)            | -11.82 (-39.79 to 16.16)           | <b>-29.79 (-51.21 to -8.37) †</b>  | 9.40 (-21.50 to 40.30)             |
| Gauze 33% vs. Equicel 55%     | -8.10 (-19.26 to 3.07)            | <b>-26.88 (-49.72 to -4.03) †</b>  | <b>-51.22 (-72.64 to -29.80) †</b> | -24.43 (-55.33 to 6.48)            |
| Gauze 33% vs. Equicel 100%    | -10.06 (-21.22 to 1.10)           | <b>-35.70 (-58.54 to -12.85) †</b> | <b>-60.11 (-81.53 to -38.69) †</b> | <b>-34.49 (-65.39 to -3.58) †</b>  |
| Gauze 33% vs. Equitamp 33%    | 8.52 (-2.65 to 19.68)             | 6.49 (-16.35 to 29.33)             | 7.60 (-13.82 to 29.02)             | 14.81 (-16.09 to 45.72)            |
| Gauze 33% vs. Equitamp 55%    | 6.78 (-4.38 to 17.94)             | 1.56 (-21.29 to 24.40)             | 7.07 (-14.35 to 28.49)             | 11.40 (-19.50 to 42.31)            |
| Gauze 33% vs. Equitamp 100%   | 2.29 (-8.87 to 13.46)             | 2.92 (-19.93 to 25.76)             | 9.25 (-12.17 to 30.67)             | 9.12 (-21.79 to 40.02)             |
| Gauze 55% vs. Gauze 100%      | -0.23 (-11.39 to 10.93)           | -2.93 (-25.77 to 19.91)            | 7.45 (-13.97 to 28.86)             | -7.25 (-38.15 to 23.65)            |
| Gauze 55% vs. Equicel 33%     | -1.90 (-13.06 to 9.27)            | -9.88 (-37.86 to 18.09)            | -17.45 (-38.87 to 3.97)            | 24.32 (-6.58 to 55.22)             |
| Gauze 55% vs. Equicel 55%     | -8.49 (-19.66 to 2.67)            | <b>-24.94 (-47.79 to -2.10) †</b>  | <b>-38.87 (-60.29 to -17.45) †</b> | -9.51 (-40.41 to 21.39)            |
| Gauze 55% vs. Equicel 100%    | -10.46 (-21.62 to 0.71)           | <b>-33.77 (-56.61 to -10.92) †</b> | <b>-47.76 (-69.18 to -26.35) †</b> | -19.57 (-50.47 to 11.34)           |
| Gauze 55% vs. Equitamp 33%    | 8.12 (-3.04 to 19.28)             | 8.42 (-14.42 to 31.27)             | 19.95 (-1.47 to 41.37)             | 29.73 (-1.17 to 60.63)             |
| Gauze 55% vs. Equitamp 55%    | 6.38 (-4.78 to 17.55)             | 3.49 (-19.36 to 26.33)             | 19.41 (-2.01 to 40.83)             | 26.32 (-4.58 to 57.22)             |
| Gauze 55% vs. Equitamp 100%   | 1.90 (-9.27 to 13.06)             | 4.85 (-18.00 to 27.69)             | <b>21.60 (0.18 to 43.02) †</b>     | 24.04 (-6.87 to 54.94)             |
| Gauze 100% vs. Equicel 33%    | -1.67 (-12.83 to 9.50)            | -6.95 (-34.93 to 21.02)            | <b>-24.89 (-46.31 to -3.47) †</b>  | <b>31.57 (0.67 to 62.47) †</b>     |
| Gauze 100% vs. Equicel 55%    | -8.26 (-19.43 to 2.90)            | -22.01 (-44.86 to 0.83)            | <b>-46.32 (-67.74 to -24.90) †</b> | -2.26 (-33.16 to 28.65)            |
| Gauze 100% vs. Equicel 100%   | -10.23 (-21.39 to 0.94)           | <b>-30.84 (-53.68 to -7.99) †</b>  | <b>-55.21 (-76.63 to -33.79) †</b> | -12.32 (-43.22 to 18.59)           |
| Gauze 100% vs. Equitamp 33%   | 8.35 (-2.81 to 19.51)             | 11.35 (-11.49 to 34.20)            | 12.50 (-8.92 to 33.92)             | <b>36.98 (6.08 to 67.89) †</b>     |
| Gauze 100% vs. Equitamp 55%   | 6.61 (-4.55 to 17.78)             | 6.42 (-16.43 to 29.26)             | 11.97 (-9.45 to 33.38)             | <b>33.57 (2.67 to 64.48) †</b>     |
| Gauze 100% vs. Equitamp 100%  | 2.13 (-9.04 to 13.29)             | 7.78 (-15.07 to 30.62)             | 14.15 (-7.27 to 35.57)             | <b>31.29 (0.38 to 62.19) †</b>     |
| Equicel 33% vs. Equicel 55%   | -6.60 (-17.76 to 4.57)            | -15.06 (-43.04 to 12.92)           | <b>-21.42 (-42.84 to -0.01) †</b>  | <b>-33.83 (-64.73 to -2.92) †</b>  |
| Equicel 33% vs. Equicel 100%  | -8.56 (-19.72 to 2.60)            | -23.88 (-51.86 to 4.09)            | <b>-30.32 (-51.74 to -8.90) †</b>  | <b>-43.89 (-74.79 to -12.98) †</b> |
| Equicel 33% vs. Equitamp 33%  | 10.02(-1.15 to 21.18)             | 18.30 (-9.67 to 46.28)             | <b>37.40 (15.98 to 58.81) †</b>    | 5.41 (-25.49 to 36.32)             |
| Equicel 33% vs. Equitamp 55%  | 8.28 (-2.88 to 19.44)             | 13.37 (-14.61 to 41.35)            | <b>36.86 (15.44 to 58.28) †</b>    | 2.00 (-28.90 to 32.91)             |
| Equicel 33% vs. Equitamp 100% | 3.79 (-7.37 to 14.96)             | 14.73 (-13.25 to 42.71)            | <b>39.04 (17.63 to 60.46) †</b>    | -0.28 (-31.19 to 30.62)            |
| Equicel 55% vs. Equicel 100%  | -1.97 (-13.13 to 9.20)            | -8.82 (-31.67 to 14.02)            | -8.89 (-30.31 to 12.53)            | -10.06 (-40.96 to 20.84)           |
| Equicel 55% vs. Equitamp 33%  | <b>16.61 (5.45 to 27.78) †</b>    | <b>33.37 (10.52 to 56.21) †</b>    | <b>58.82 (37.40 to 80.24) †</b>    | <b>39.24 (8.34 to 70.14) †</b>     |
| Equicel 55% vs. Equitamp 55%  | <b>14.88 (3.71 to 26.04) †</b>    | <b>28.43 (5.59 to 51.28) †</b>     | <b>58.28 (36.86 to 79.70) †</b>    | <b>35.83 (4.93 to 66.73) †</b>     |
| Equicel 55% vs. Equitamp 100% | 10.39 (-0.78 to 21.55)            | <b>29.79 (6.95 to 52.63) †</b>     | <b>60.47 (39.05 to 81.89) †</b>    | <b>33.54 (2.64 to 64.45) †</b>     |
| Equicel 100% vs. Equitamp 33% | <b>18.58 (7.41 to 29.74) †</b>    | <b>42.19 (19.34 to 65.03) †</b>    | <b>67.71 (46.29 to 89.13) †</b>    | <b>49.30 (18.40 to 80.20) †</b>    |

|                                       |                                |                                 |                                 |                                 |
|---------------------------------------|--------------------------------|---------------------------------|---------------------------------|---------------------------------|
| <b>Equicel 100% vs. Equitamp 55%</b>  | <b>16.84 (5.68 to 28.00) †</b> | <b>37.25 (14.41 to 60.10) †</b> | <b>67.18 (45.76 to 88.60) †</b> | <b>45.89 (14.99 to 76.79) †</b> |
| <b>Equicel 100% vs. Equitamp 100%</b> | <b>12.35 (1.19 to 23.52) †</b> | <b>38.61 (15.77 to 61.46) †</b> | <b>69.36 (47.94 to 90.78) †</b> | <b>43.60 (12.70 to 74.50) †</b> |
| <b>Equitamp 33% vs. Equitamp 55%</b>  | -1.74 (-12.90 to 9.43)         | -4.93 (-27.78 to 17.91)         | -0.54 (-21.96 to 20.88)         | -3.41 (-34.31 to 27.49)         |
| <b>Equitamp 33% vs. Equitamp 100%</b> | -6.23 (-17.39 to 4.94)         | -3.57 (-26.42 to 19.27)         | 1.65 (-19.77 to 23.07)          | -5.70 (-36.60 to 25.21)         |
| <b>Equitamp 55% vs. Equitamp 100%</b> | -4.49 (-15.65 to 6.67)         | 1.36 (-21.48 to 24.20)          | 2.19 (-19.23 to 23.60)          | -2.29 (-33.19 to 28.61)         |

Values for Tabotamp<sup>®</sup> are already published<sup>10</sup> and therefore not listed here. Fluorescence signal of total cell lysis was set to 100 %. The respective mean values as well as the mean difference and 95% confidence interval are shown. SW10 (Schwann cells), RN33B (neuronal cells), C8D1A (astrocytic cells). † indicates p<0.05 analyzed with one-way ANOVA followed Bonferroni's test.
